# Supplementary material for: Ecosystem respiration during snowmelt and soil thaw leads to a rare annual CO₂ net loss in a boreal fen
Source: Copernicus journal article supplement (doi:10.5194/egusphere-2025-5778), 2025-12-11
Supplement: Supplementary file 1 [file egusphere-2025-5778-supplement.pdf]

**Table S1.** NGS and GS periods, duration and mean NEE and air temperature during each period.

| NGS       |                 |                    |                                       |                    | GS   |                 |                    |                                       |                    |
|-----------|-----------------|--------------------|---------------------------------------|--------------------|------|-----------------|--------------------|---------------------------------------|--------------------|
| Year      | NGS period      | Duration<br>(days) | Mean NEE<br>(g C/m <sup>2</sup> /day) | Mean Air T<br>(°C) | Year | GS period       | Duration<br>(days) | Mean NEE<br>(g C/m <sup>2</sup> /day) | Mean Air T<br>(°C) |
| 2005-2006 | 07.10. – 18.03. | 162                | 0.22                                  | -3.76              | 2006 | 19.03. – 23.08. | 158                | -0.32                                 | 10.9               |
| 2006-2007 | 24.08. – 26.04. | 245                | 0.19                                  | 1.51               | 2007 | 27.04. – 20.09. | 147                | -0.61                                 | 12.7               |
| 2007-2008 | 21.09. – 28.04. | 220                | 0.14                                  | -0.07              | 2008 | 29.04. – 13.09. | 138                | -0.88                                 | 12.0               |
| 2008-2009 | 14.09. – 26.04. | 223                | 0.20                                  | -0.44              | 2009 | 27.04. – 20.09. | 147                | -0.62                                 | 13.2               |
| 2009-2010 | 21.09. – 03.05. | 224                | 0.17                                  | -4.31              | 2010 | 04.05. – 10.09. | 130                | -0.77                                 | 14.9               |
| 2010-2011 | 11.09. – 26.04. | 227                | 0.19                                  | -3.22              | 2011 | 27.04. – 25.10. | 182                | -0.66                                 | 12.7               |
| 2011-2012 | 26.10. – 28.04. | 185                | 0.14                                  | -2.50              | 2012 | 29.04. – 26.09. | 152                | -0.97                                 | 12.2               |
| 2012-2013 | 27.09. – 30.04. | 214                | 0.24                                  | -2.78              | 2013 | 01.05. – 17.09. | 140                | -1.04                                 | 14.8               |
| 2013-2014 | 18.09. – 21.04. | 215                | 0.22                                  | 0.06               | 2014 | 22.04. – 20.09. | 152                | -0.92                                 | 13.5               |
| 2014-2015 | 21.09. – 29.04. | 220                | 0.24                                  | 0.30               | 2015 | 30.04. – 15.09. | 139                | -0.88                                 | 12.7               |
| 2015-2016 | 16.09. – 01.06. | 259                | 0.33                                  | 1.43               | 2016 | 02.06. – 21.09. | 112                | -0.51                                 | 14.2               |
| 2016-2017 | 22.09. – 19.05. | 238                | 0.18                                  | -0.66              | 2017 | 20.05. – 29.09. | 133                | -0.69                                 | 12.4               |
| 2017-2018 | 30.09. – 07.05. | 219                | 0.23                                  | -1.57              | 2018 | 08.05. – 29.07. | 83                 | -0.65                                 | 16.7               |
| 2018-2019 | 30.07. – 04.05. | 278                | 0.25                                  | 3.09               | 2019 | 05.05. – 03.09. | 122                | -0.62                                 | 14.3               |
| 2019-2020 | 04.09. – 11.05. | 250                | 0.22                                  | 1.43               | 2020 | 12.05. – 02.09. | 114                | -0.74                                 | 14.6               |
| 2020-2021 | 03.09. – 26.04. | 234                | 0.27                                  | 0.11               | 2021 | 27.4. – 10.9    | 136                | -0.85                                 | 14.3               |

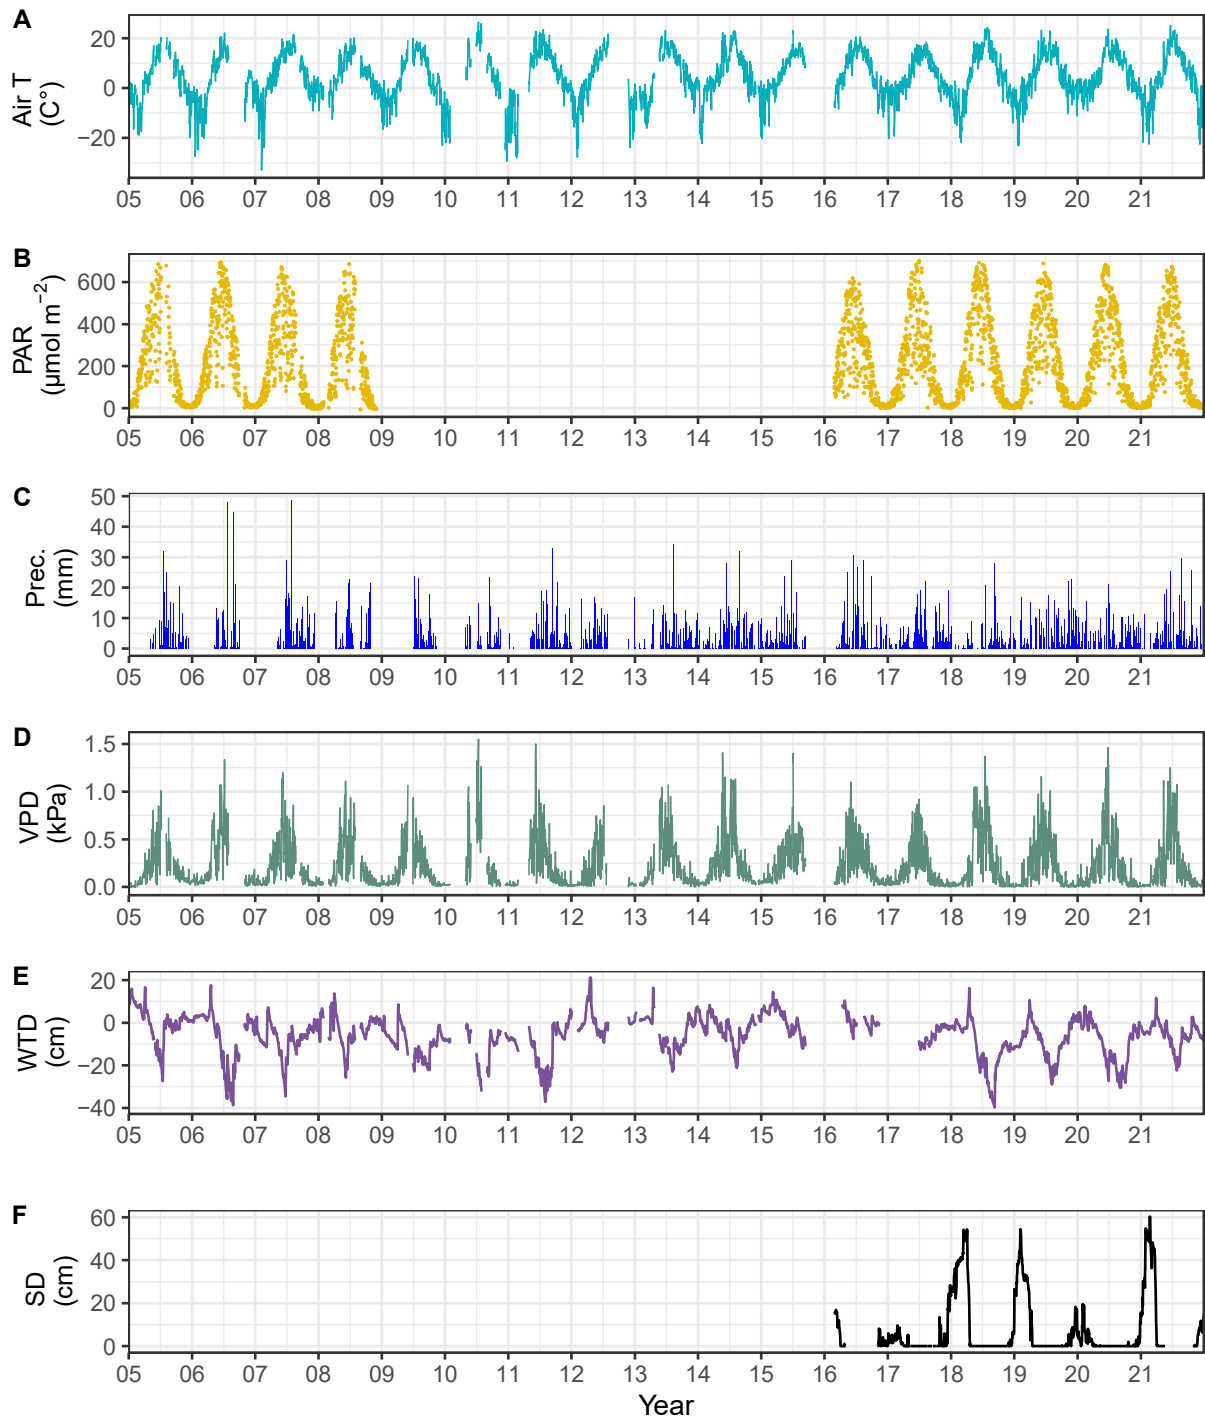

**Figure S1.** Time series of air temperature (A), precipitation (B), photosynthetically active radiation (C), vapor pressure deficit (D), water table depth (E) and snow depth (F) in 2005-2021. Precipitation is expressed as daily sums and is calculated from the hourly summed data. The other variables are expressed as daily means and are

calculated from hourly averaged data. Data for PAR in 2009-2015 was not used due to instrument malfunction. Snow depth measurements started at spring 2016. Precipitation data shown in the figure is measured with ARG-100 tipping bucket rain gauge in 2006-2016 and with OTT Pluvio2S weighing rain gauge in 2017-2021.

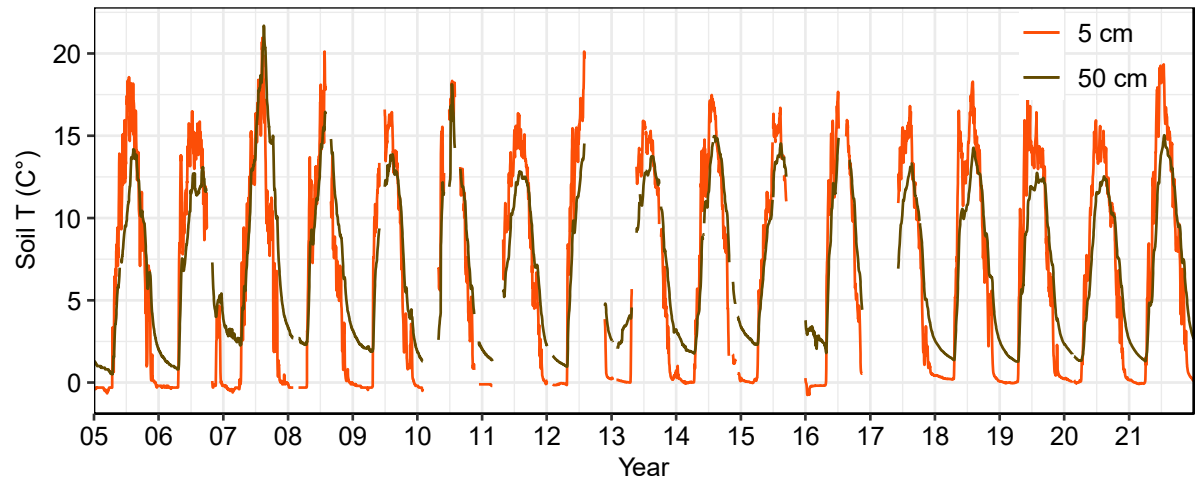

**Figure S2.** Time series of daily means of soil temperature at 5 cm depth (red line) and 50 cm depth (brown line). Daily means are calculated from hourly averaged data. The measurement practices changed in 2017, including the measurement depth. The figure of the time series of soil temperature at 50 cm depth includes the temperature measured at 50 cm depth for 2005-2016 and temperature measured at 45 cm depth for 2017-2021. The data for both measuring depths is from lawn microsite for 2005-2016 and an average of five microsites for 2017-2021.

# NEE and environmental variables with GS/NGS start and F/T state marked

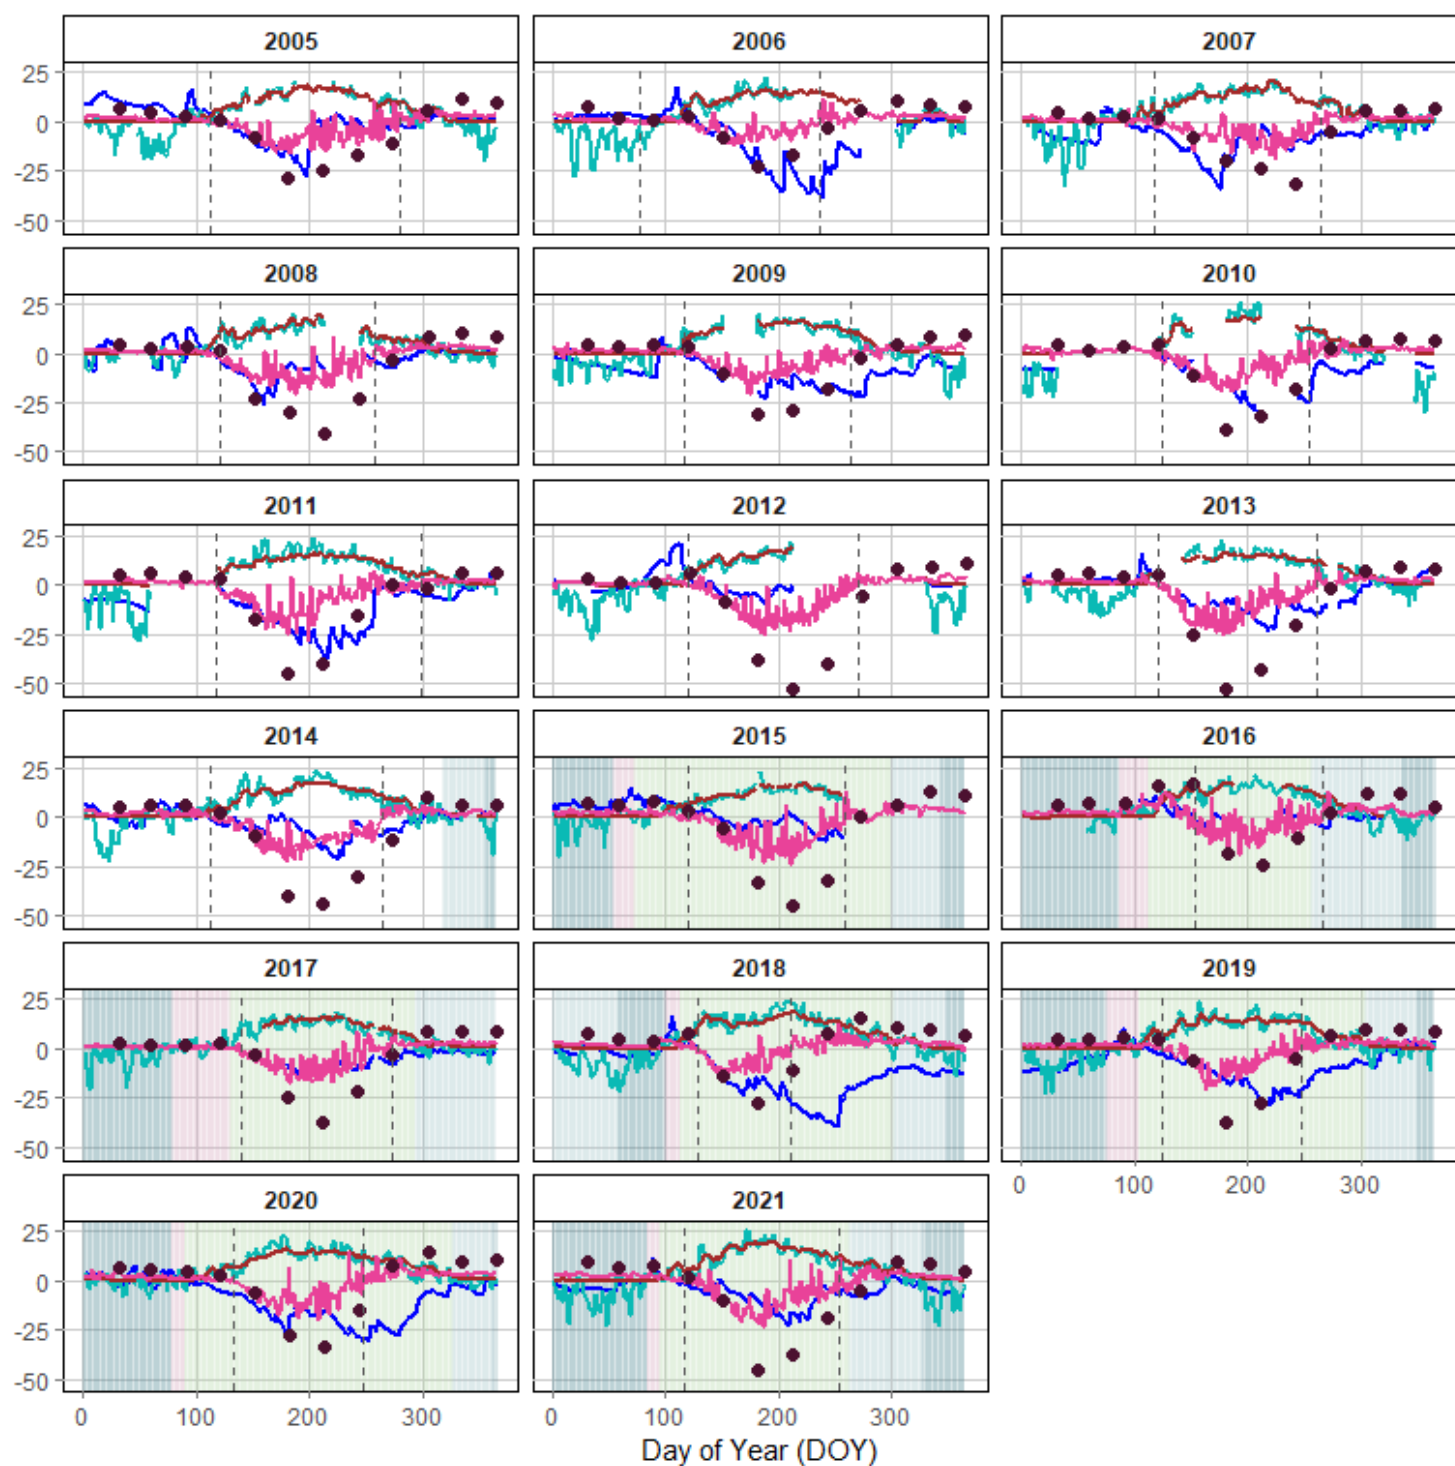

Freeze/Thaw State    freezing    frozen    thawed    thawing

Variable    Air Temperature (celsius)    NEE g C/day x 10    NEE g C/month    Soil Temperature    Water Table Depth

20 **Figure S3.** Daily sums of te Net ecosystem exchange of CO2 (NEE), air and soil temperature and water table  
 depth during each year 2005-2021. The end and start of the NGS are marked with vertical dashed lines - first  
 three days of negative NEE marked the end of NGS and first three consecutive days of positive NEE marked the  
 start of NGS. Freeze-thaw status is marked with the background colour for the years 2014-2021. The status is  
 25 determined for a 200meter radius from the Eddy Covariance mast and determined from Sentinel-1 IW GRD radar  
 backscatter time series. Monthly sums of NEE are marked with a brown scatter. The daily values of NEE are  
 multiplied by 10 for visibility.

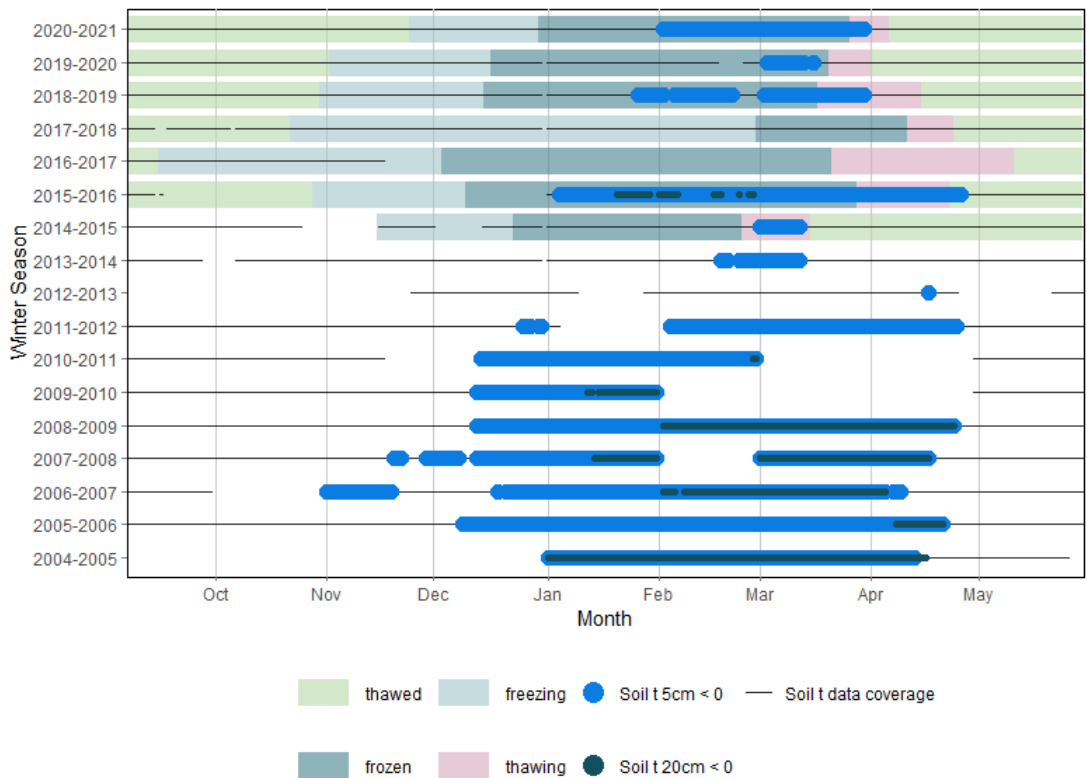

30 **Figure S4.** Freeze-thaw status and site-measured soil temperature (Soil t) below freezing temperatures during  
 winter. The freeze-thaw status has been assigned for 200m radius around the eddy-Scovariance (EC) mas, and  
 is determined from Sentinel-1 IW GRD radar backscatter time series. Soil temperature is measured on site. Daily  
 mean soil temperature below 0°C at 5 cm (light blue) and 20 cm (dark blue) depth are marked as thick  
 35 lines. Horizontal line shows the data coverage for the soil temperature.

35 **Table S2.** Freezing, frozen and thawing periods for 2014-2021. The status is determined for a 200meter radius  
 from EC mast. The freezing and thawing periods were determined from Sentinel-1 IW GRD radar backscatter  
 time series (2014–2021) using visual inspection of median VV, VH, and VH/VV ratio trends from both orbit  
 directions, supported by ground measurements of temperature, soil moisture, and snow depth.

| Winter-Spring | Freezing Period | Frozen Period | Thawing Period | Freezing Duration (days) | Frozen Duration (days) | Thawing Duration (days) |
|---------------|-----------------|---------------|----------------|--------------------------|------------------------|-------------------------|
| 2014-2015     | 15.11 – 22.12   | 23.12 – 23.02 | 24.02 – 14.03  | 38                       | 63                     | 19                      |
| 2015-2016     | 28.10 – 09.12   | 10.12 – 26.03 | 27.03 – 21.04  | 43                       | 108                    | 26                      |
| 2016-2017     | 14.09 – 01.12   | 02.12 – 20.03 | 21.03 – 10.05  | 79                       | 109                    | 51                      |
| 2017-2018     | 22.10 – 27.02   | 28.02 – 10.04 | 11.04 – 23.04  | 129                      | 42                     | 13                      |
| 2018-2019     | 30.10 – 14.12   | 15.12 – 16.03 | 17.03 – 14.04  | 46                       | 92                     | 29                      |
| 2019-2020     | 02.11 – 16.12   | 17.12 – 18.03 | 19.03 – 30.03  | 45                       | 93                     | 12                      |
| 2020-2021     | 23.11 – 28.12   | 29.12 – 25.03 | 26.03 – 05.04  | 36                       | 87                     | 11                      |
| 2021-2022     | 21.09 – 24.11   | -             | -              | 65                       | -                      | -                       |

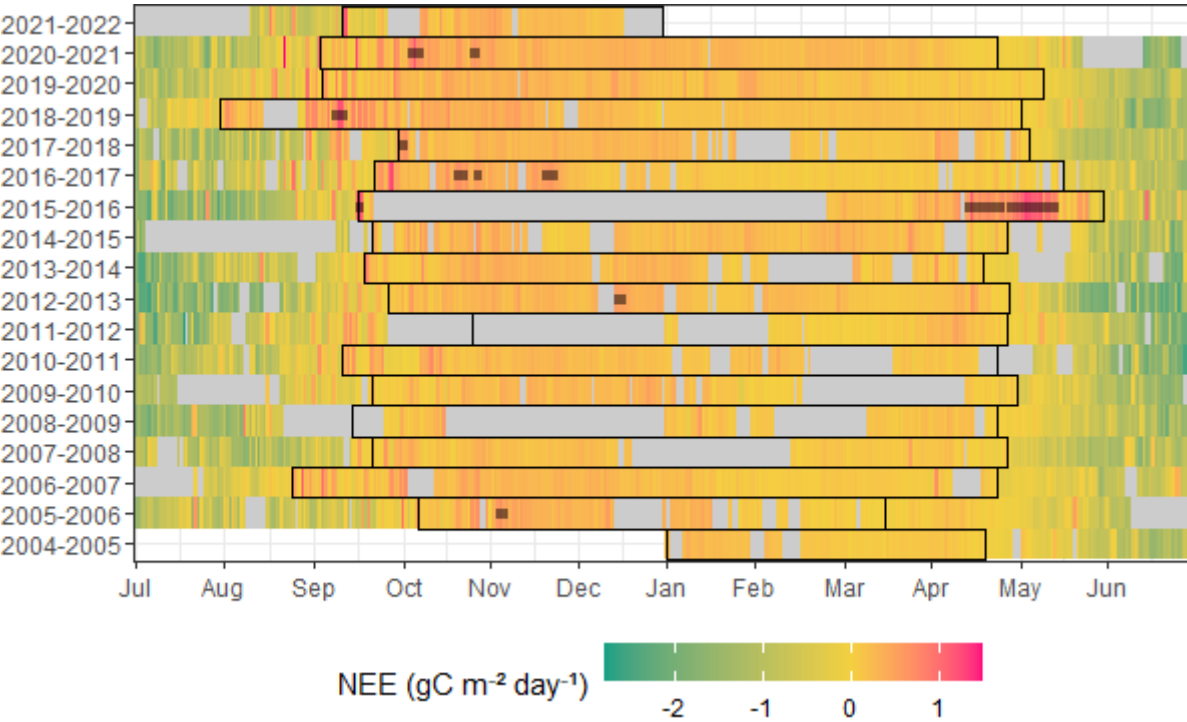

**Figure S5.** Daily net ecosystem exchange (NEE;  $\text{gC m}^{-2} \text{ day}^{-1}$ ) in 2005-2021 and the non-growing season (NGS) periods centered in the winter. Each row represents one year beginning in July and ending in June of the following year. Colors indicate daily mean NEE values, where yellow - green gradient reflects negative values (net carbon sink) and yellow - pink gradient reflects positive values (net carbon release). Black rectangular outlines mark the NGS periods, defined as the period beginning after the first three consecutive days of positive NEE and ending after the first three consecutive days of negative NEE. Black vertical lines mark the periods with three or more consecutive days with daily mean flux values exceeding the upper 95<sup>th</sup> percentile. The grey tiles

mark the days with less than 12 hourly observations, meaning that more than 12 of the hourly values are gapfilled.

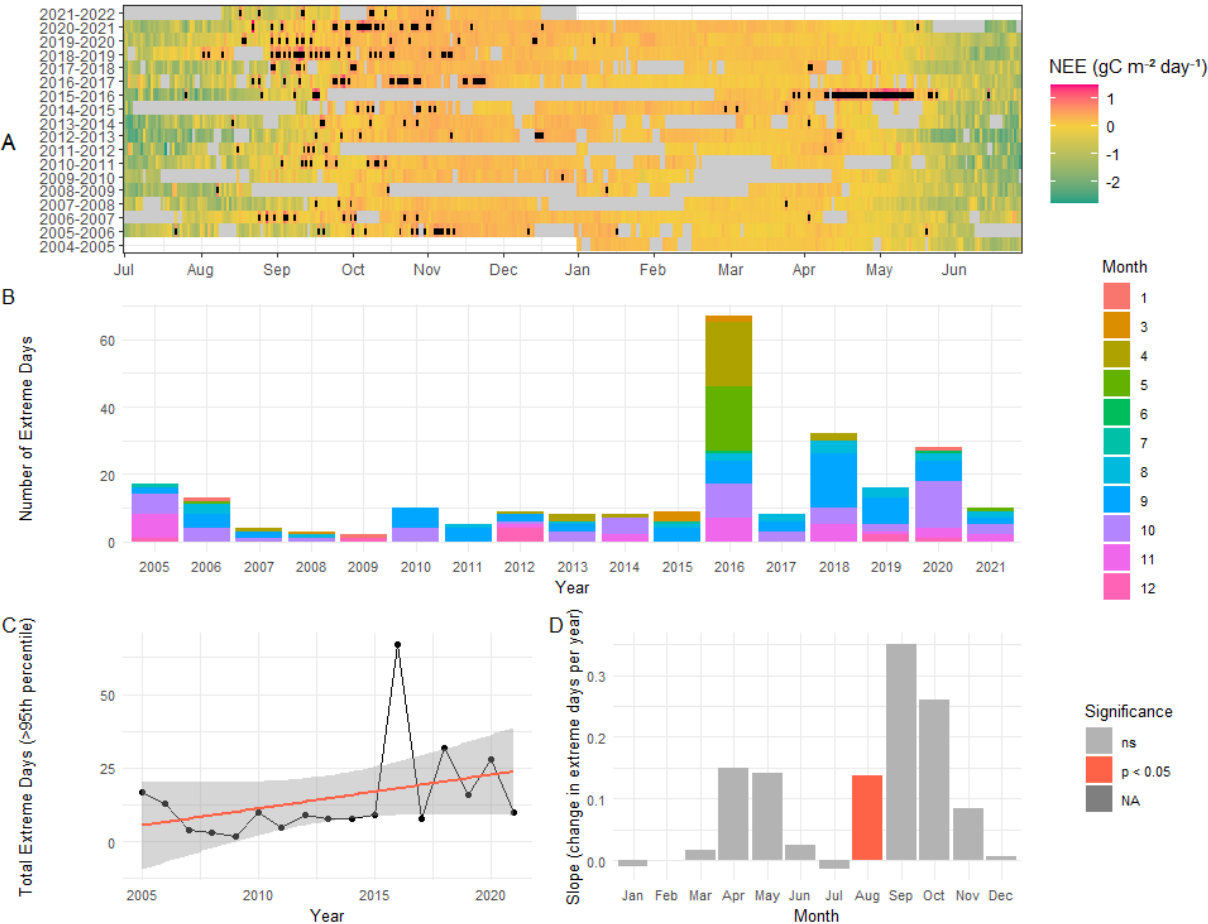

**Figure S6.** A) Daily net ecosystem exchange (NEE;  $\text{gC m}^{-2} \text{ day}^{-1}$ ) in 2005-2021 and the daily values exceeding the 95<sup>th</sup> percentile (black). Each row represents one year beginning in July and ending in June of the following year. Colors indicate daily mean NEE values, where yellow - green gradient reflects negative values (net carbon sink) and yellow - pink gradient reflects positive values (net carbon release). The grey tiles mark the days with less than 12 hourly observations, meaning that more than 12 of the hourly values are gapfilled. B) The Amount of days of daily NEE exceeding the 95<sup>th</sup> percentile by year, coloured by month. C) The amount of days of daily NEE exceeding the 95<sup>th</sup> percentile with a linear regression line fitted (red) and standard deviation marked as grey shading. D) The slope of change in extreme days per year aggregated by month. The colour of the bar indicates the significance of the change (grey=insignificant and red: significant).
